# Supplementary material
Source: PubMed Central journal article supplement (PMC8068611)

## Supplemental data

**Supplemental Table 1. Primers used for amiRNA sequencing and cloning**

| PRIMER NAME | SEQUENCE                                                     |
|-------------|--------------------------------------------------------------|
| PHA2804F    | AGAGAACACGGGGGACGAG                                          |
| PHA3479R    | AAACCGGCGGTAAGGATCTG                                         |
| RE-AMI-F    | GGGGACAAGTTTGTACAAAAAAGCAGGCTTAGAATTCCTGCAGCCCCAAACA<br>CACG |
| RE-AMI-R    | GGGGACCACTTTGTACAAGAAAGCTGGGTCGGATCCCCCATGGCGATGCCT<br>TA    |

Do not distribute

**Supplemental Table 2. Salk lines and primers for genotyping**

| <b>GENE</b>                     | <b>GENE ID</b> | <b>SALK LINE</b> | <b>PRIMER SEQUENCE</b>      |
|---------------------------------|----------------|------------------|-----------------------------|
| <b>ERF34</b>                    | AT2G44940      | SALK_020979C     | LB1.3: ATTTTGCCGATTTTCGGAAC |
|                                 |                |                  | LP: TGTTAAGAGGTGACGCACATG   |
|                                 |                |                  | RP: ACTCACATCGTTGACCGAATC   |
| <b>ERF35</b>                    | AT3G60490      | SALK_111486C     | LB1.3: ATTTTGCCGATTTTCGGAAC |
|                                 |                |                  | LP: TTATCGATAACCGGTTTGTGC   |
|                                 |                |                  | RP: TAAAACAATCCAGACCCATGC   |
| <b>CRISP<br/>RCBF1/<br/>2/3</b> | AT4G25490      | GT1              | AGACAGCGAGTGGAACATCG        |
|                                 | AT4G25470      | GT2              | TTGTTGCTTATGGGGAGACCA       |
|                                 | AT4G25490      | GT3              | AAGTCCCGAGCCAAATCCTG        |

not distribute

**Supplemental Table 3. Primers used for RTq-PCR**

| PRRMER    | SEQUENCE                       |
|-----------|--------------------------------|
| PHT1;1-QF | GTTCTTAATTTCTCCTGCCAAGCTGATTA  |
| PHT1;1-QR | CATCATAACTTAAGGTCAACGAGCCAATA  |
| PHT1;2-QF | GAACAACAACCTAGGAGTGCTAAAGGCACT |
| PHT1;2-QR | CTAACTTCAGCTTCACCAGAGAGTTCTTC  |
| PHT1;3-QF | GATCAACAGCTAGGAGTGCTAAAGGCACT  |
| PHT1;3-QR | TATCAACCTCAGCCTCGCCGAGAGTTCT   |
| PHT1;4-QF | CTCTCTCAACATTTTCCCCTGAAAATAAG  |
| PHT1;4-QR | AGAACAACCTTGAGTTGCTAGAGACAAGGA |
| PHT1;5-QF | ACGCAGCCAAAACGCAGATGTACCATTTT  |
| PHT1;5-QR | GGACTTTTCTACCGGAATTTGCCACAGTC  |
| PHT1;6-QF | ACGTTATACATCATGGCAGGAATCAAT    |
| PHT1;6-QR | AAGCTCCTCAAGTGATTTCCCATTAGT    |
| PHT1;7-QF | TGGAGGATATCCATGCTCTGTCT        |
| PHT1;7-QR | CGCGGCTTCTGGAAAATTAG           |
| PHT1;8-QF | GCTCTTCTGCTGCATTGACG           |
| PHT1;8-QR | AGGAGGTGGATCCGTCGTGGCTT        |
| PHT1;9-QF | CCGCCAGATACACAGCATTGGT         |
| PHT1;9-QR | CGACCGTGGAGACTGAGGAAAC         |
| PHT4;1-QF | TCTTCTGGGGTTACCTTCTTACACAGA    |
| PHT4;1-QR | TGAGAATTGTAGCGATTGACCACCAA     |
| PHT4;2-QF | GATGATGCCTGAGAGGATTAAGGTAGT    |
| PHT4;2-QR | TAACAACCTCTGTCGGCGTTACATAGA    |
| PHT4;3-QF | CAGAATTTATAACGTCGGAGAGAGTCAA   |
| PHT4;3-QR | AAAATGATTTGCTCCATCCACGAGAAAG   |
| PHT4;4-QF | TGTGAACATGAGCATTGCAATTCTT      |
| PHT4;4-QR | CAACAGTTGCACTACTCCAGTTATATTCT  |
| PHT4;5-QF | TCCAGTCTTCCTTCTTTTGGGGTTATG    |
| PHT4;5-QR | CGAAAGACCATGTAAAGACACCAATCT    |
| PHT4;6-QF | GATTGGTTTCGATAACGACATCAGGAA    |
| PHT4;6-QR | ATTCCGGACCTCTAAGCTCAACTAA      |
| PHT2;1-QF | CTCCTCTCTCCTTAGCTGCAGCTG       |
| PHT2;1-QR | GCGAATGACATGAAGCAAGCGGAGAG     |
| HP30-1-QF | GCGTTGACCTCAAGCCATA            |
| HP30-1-QR | CTGCCACCACTGCAGATTCA           |
| HP30-2-QF | TTAGCTGACCCAACCTCTGCC          |
| HP30-2-QR | TAGCTCAGGGTCCCTTTGGA           |

|          |                           |
|----------|---------------------------|
| CPK31-QF | CGCTGGGAGTGCTTACTACATTGC  |
| CPK31-QR | ACTTCCATGATTCGCTGTCAACGTC |

### Supplemental Figure 1

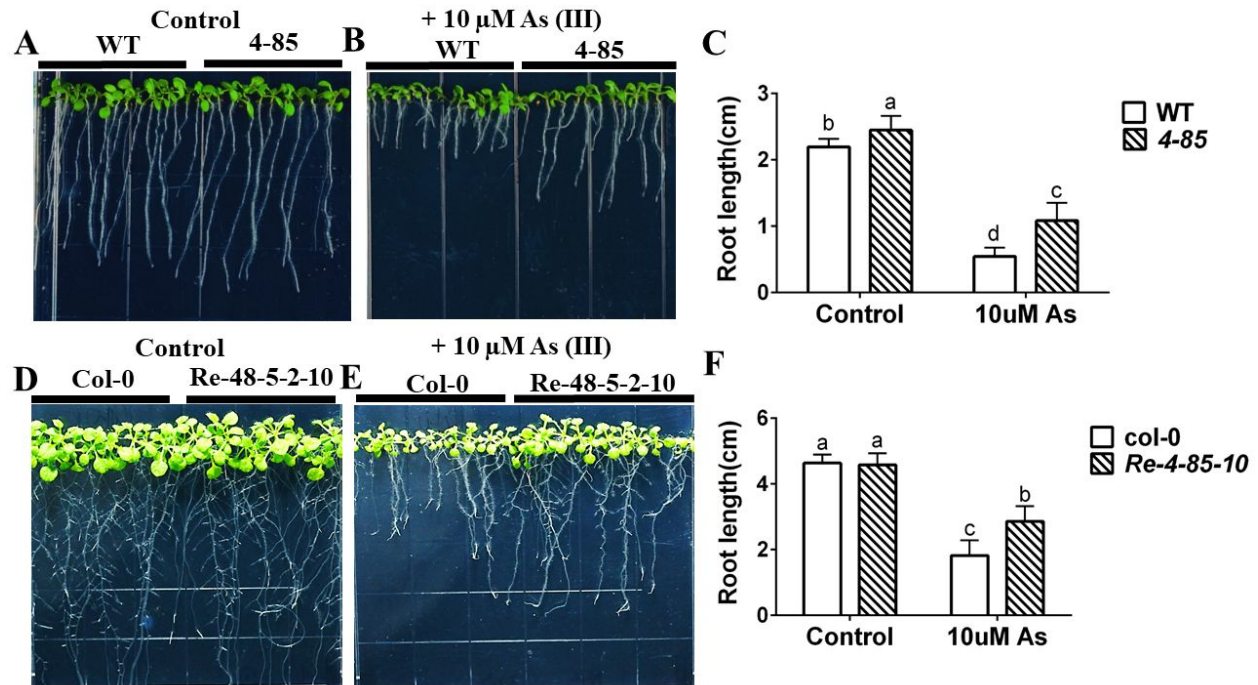

ibute

## Supplemental Figure 2

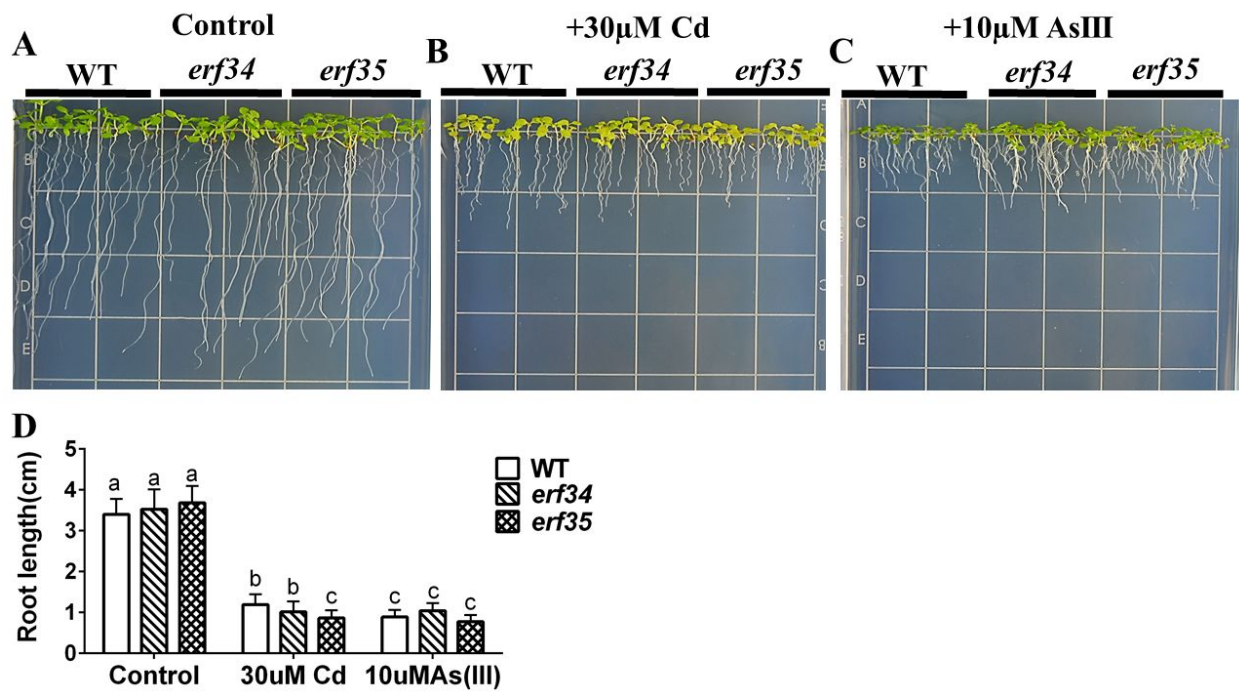

## Supplemental Figure 3

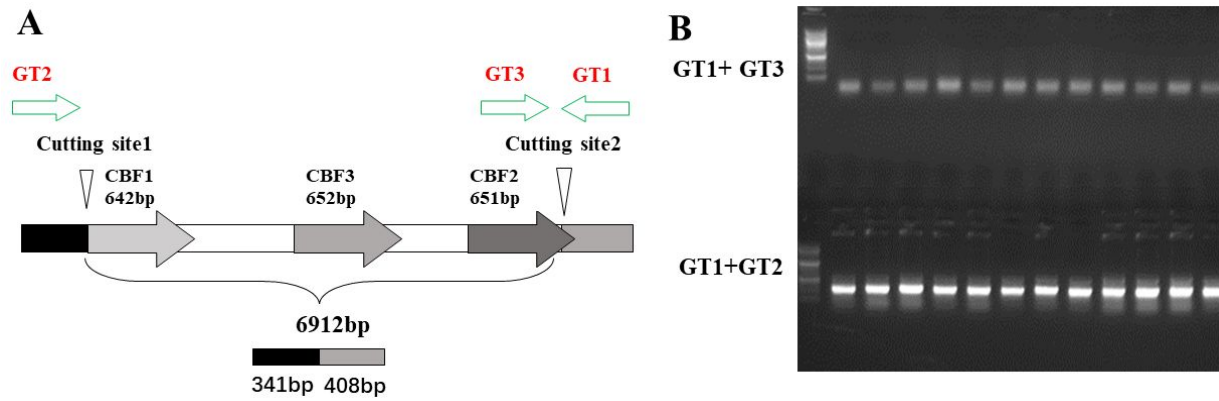

## Supplemental Figure 4

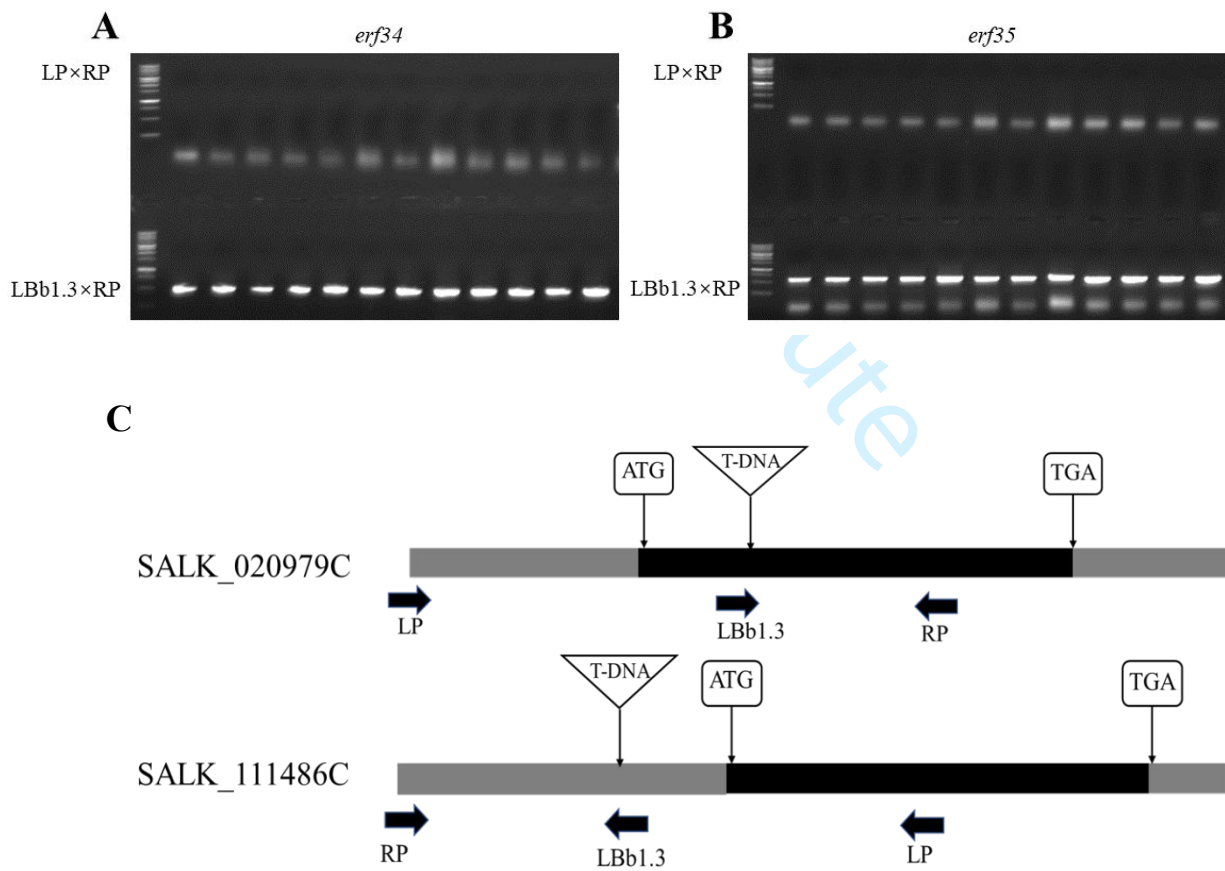

**Supplemental Figure 5**

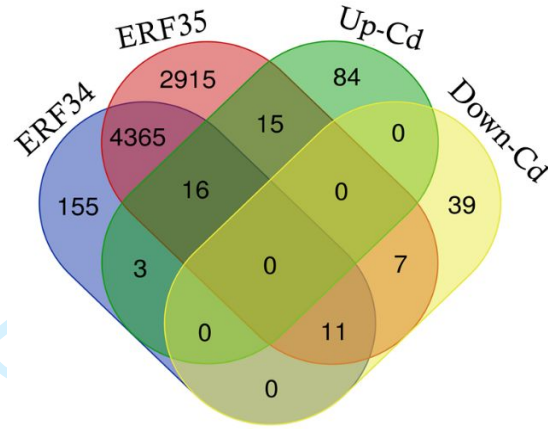

**Supplemental Figure 6**

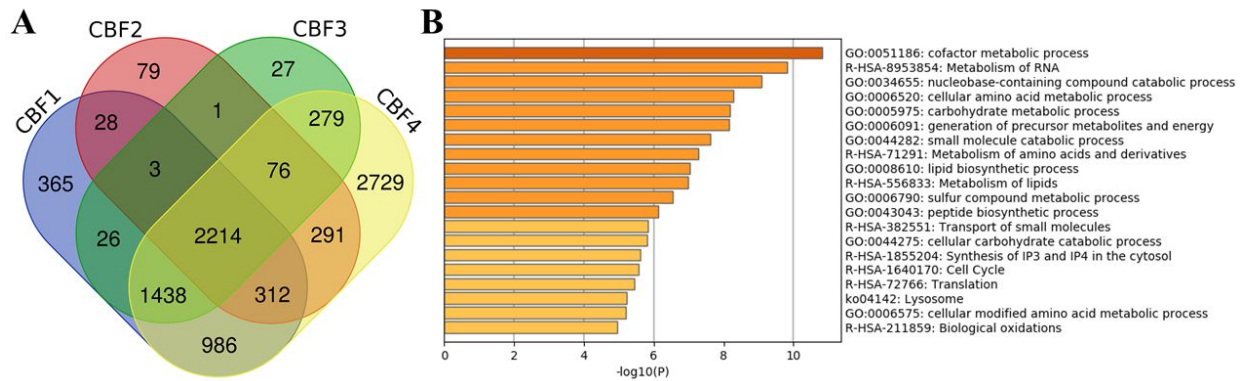

Supplement: NIHMS1671089-supplement-1.pdf [file NIHMS1671089-supplement-1.pdf]
